# Supplementary material for: Short communication: Resolving the discrepancy between U–Pb age estimates for the ‘Likhall’ zircon bed, a key level in the Ordovician timescale
Source: Copernicus journal article supplement (doi:10.5194/egusphere-2023-2597), 2023-11-27
Supplement: Supplementary file [file egusphere-2023-2597-RC2-supplement.pdf]

The paper presents a third U-Pb zircon data set for zircons recovered from the Ordovician Likhall carbonate horizon in Sweden. The data appears to be superior to previous efforts in that they have successfully increased the ratio of radiogenic to common Pb in a subset of zircons that they use to determine their preferred age. The data appear to be of high quality and the new age an improvement that will have impact on the Ordovician timescale and a debate concerning a possible link between the Great Ordovician Biodiversification Event (GOBE) and the break up and arrival of an L-chondrite asteroid. On these merits alone, the paper should be considered worth publishing.

However, the paper gets seriously sidetracked in its effort to assess the two previously published U-Pb zircon studies of this same horizon (same samples in at least one other study as the author Lindskog provided the zircons to both). In this endeavour, they provide a confusing (and in places factually incorrect) discussion of why they believe the different studies have delivered different ages. They ultimately suggest that the other ages are inaccurate but then go ahead anyways and try to assess the different methods of treating a range of ages from a volcanic horizon that only makes sense if all the individual zircon ages are assumed to be accurate.

While the paper expends much effort in the comparison of different data sets and recommendations for the chemical abrasion method, there is only 8 lines of discussion (Section 5.6) of the implication of their unrevised age on timescale issues and no mention that I found of the implication for the debate on whether the Ordovician L-chondrite break up had anything to do with the GOBE.

I would recommend that the authors be encouraged to make major revisions to the paper, toning down the detailed assessment of the two previous studies. They can demonstrate by way of the Pbr/Pbc that their data (and uncertainties) are better than previous efforts and then focus on the implications.

I have annotated the manuscript extensively with comments and provide the following more general points keyed to different sections of the discussion that I feel are important.

#### *5.1 Radiogenic Pb/common Pb ratio (Pb\*/Pbc) as a selection criterion*

In this section, the authors suggest that the zircons analysed in Lindskog et al had inclusions that were not removed in the partial dissolution step of the chemical abrasion method. While this may be true, they have missed or decided to ignore the point that this study assumed that all non-radiogenic Pb was blank (or modern Pb that was not removed from the zircon before digestion). If it is initial common Pb it would have an Ordovician Pb composition that would have had lower 7/4 and 6/4 ratios resulting in older, not younger, ages. They never recognize this problem and seem to consider common Pb, blank Pb and initial Pb as one and the same.

#### *5.2 Residual Pb-loss in chemically abraded natural zircon*

After concluding in section 5.1 that the Lindskog et al data was troubled by low Pbr/Pbc, they explore here a different tack in that perhaps there were residual domains that had lost Pb that were not removed by the lower temperature etching step employed in this study. But this would have the opposite effect of producing younger ages rather than the older ages they are trying to explain away. L205 states that they conclude that both previous studies “*were affected by Pb-loss domains and/or relict inclusions that were not penetrated during*

*chemical abrasion.*” This may be true for the Liao et al study that recommended a younger age but not the Lindskog et al data as suggested.

### *5.3 Lead blank isotopic composition correction effects on the spread of zircon U–Pb dates*

Here correlations between Pbr and Pbc are considered in terms of their absolute abundances without considering the difference between Pbc as Pb blank or Pb initial and that assuming one or the other would have different implications for the discussion. Again, they fail to discuss the Lindskog et al paper having assigned all non-radiogenic Pb as modern terrestrial Pb and that their interpretation of Pb-bearing inclusions of presumed Ordovician age would have lower 6/4 and 7/4 ratios, producing older calculated ages in both decay schemes. This makes the difference in ages between the two studies worse rather than explaining it away.

### *5.4 The impact of the interpretation strategy on U–Pb zircon ages*

This section runs through the different established strategies employed to make a sensible interpretation of a spread of U-Pb zircons commonly found in volcanic ash layers. A combination of issues may be in play here to cause the spread including residence time of zircons (related to magma chamber timescales) and/or detrital grains from an earlier eruption but issues that have geological explanations. These strategies assume that all the individual ages of zircons in the range are accurate for their respective crystallization and closure. But previous sections have concluded that the 2 previous studies and especially that of Lindskog et al are not reliable ages due to their high Pbc. If they have concluded that at least the Lindskog et al ages are inaccurate then they should not be considered further in this section. Only the zircons with their cut off of  $>50$  for Pbr/Pbc should be considered here.

### *5.6 Implications for the Ordovician timescale and the absolute timing of events*

This section is eight lines long without discussing the implications for the debate mentioned in the introduction regarding the connection between the Ordovician break up and arrival of the L-chondrite and the GOBE or any implications for the new age on the Ordovician timescale save that it needs to be modified. This should be the most important part of the paper else why bother to get a refined age for this horizon in the first place. As presented, it seems the main justification for this study was to show that that you need higher temperatures and longer times for the chemical abrasion method.

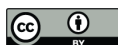

# Short communication: Resolving the discrepancy between U–Pb age estimates for the ‘Likhall’ zircon bed, a key level in the Ordovician timescale

André N. Paul<sup>1\*</sup>, Anders Lindskog<sup>2</sup>, Urs Schaltegger<sup>1</sup>

5 1) Department of Earth Sciences, Université de Genève, Switzerland

2) Department of Geology, Lund University, Sweden

\*corresponding author, e-mail: Andre.Paul@unige.ch

## Abstract

The ‘Likhall’ zircon bed is a rare case of a single-age zircon population from a carbonate rock, which in this case is contextualised with remarkable biotic and environmental changes as well as meteorite bombardment of Earth after an asteroid breakup in space. Published chemical-abrasion, high-precision isotope-dilution, thermal ionization mass spectrometry (CA-ID-TIMS) U–Pb age estimates disagree at the typical precision of <0.1% for a <sup>206</sup>Pb/<sup>238</sup>U date, which has led to discrepancies in the interpretation of the timing of events and their possible cause–effect relationships. We evaluate here the relative strengths and weaknesses, and discrepancies in the so far published datasets, propose strategies to overcome them and present a new U–Pb dataset with improved precision and accuracy. Ultimately, we find that domains of residual Pb-loss are a significant source of age-offset between previously published data, amplified by differences in data evaluation strategies. Our new dataset benefits from an improved chemical abrasion protocol resulting in a more complete mitigation of decay-damage induced grain portions, and points to a weighted mean age estimate of 466.37±0.14/0.18/0.53 Ma for the ‘Likhall’ zircon population. This age is intermediate between previous estimates, but outside of analytical uncertainty, and provides a firm tie point for the Ordovician timescale.

## 1 Introduction

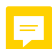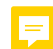

The Ordovician ‘Likhall’ zircons are hosted within a fossil rich ‘orthoceratite limestone’ at Kinnekulle, Sweden, locally referred to as ‘Täljsten’, which is an important marker interval in the regional stratigraphy (see below). These strata record remarkable changes in paleoenvironmental conditions and biodiversity (Lindskog et al., 2017; Lindskog and Eriksson, 2017; Servais and Harper, 2018). Besides being unusually rich in prismatic zircon of apparently single age, thus providing means for timescale calibration, the ‘Likhall’ bed coincides with an interval with uniquely abundant L-chondritic ‘fossil’ meteorites and purportedly related chromite grains (Lindskog et al., 2017; Liao et al., 2020; and references therein). This has been linked to the breakup of an asteroid in space and the temporal overlap between excess meteoritic matter and prominent biodiversity peaks has spurred the controversial hypothesis that Ordovician biodiversification was instigated by meteorite bombardment.

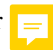

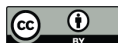

30 However, two individual U–Pb geochronological studies have arrived at significantly different age estimate of zircon from this rock – 467.50±0.28 (Lindskog et al. 2017) and 465.18±0.17 Ma (Liao et al. 2020) – each favouring contrasting conclusions for the absolute timing of the L-chondrite breakup event, (non-)correlation of the meteorite bombardment with biodiversification, and implications for the Ordovician timescales (particularly the Darriwilian Stage).

While the occurrence of an apparently single U–Pb zircon age population in a carbonate rock is already mysterious, the percent difference between these two previously published  $^{206}\text{Pb}$ - $^{238}\text{U}$  ages amounts to 0.4%, which exceeds the expected reproducibility level of, e.g., natural zircon reference materials (0.1%; Schaltegger et al., 2021). Thus, we have to evaluate the accuracy of the published U–Pb ages on the ‘Likhall’ zircons before we can determine a more robust age estimate. A significant effort has recently been undertaken by the U-Pb community to reduce inter-lab bias in isotope dilution – thermal ionisation mass spectrometry (ID-TIMS), via the use of precisely calibrated EARTHTIME (ET) isotopic tracers (Condon et al., 2015; 35 McLean et al., 2015), community-wide shared data reduction (Bowring et al., 2012; McLean et al., 2011) and sample preparation procedures (Widmann et al., 2019). However, the two previously published ‘Likhall’ datasets were produced employing different isotopic tracers, instrumentation and chemical abrasion procedures: A mixed ET  $^{202}\text{Pb}$ - $^{205}\text{Pb}$ - $^{233}\text{U}$ - $^{235}\text{U}$  tracer was used in the Lindskog et al. (2017) study, while it was an in-house  $^{202}\text{Pb}$ - $^{205}\text{Pb}$ - $^{233}\text{U}$ - $^{236}\text{U}$  tracer for the Liao et al. (2020) study. Further differences concern the measurement procedure of the U isotope composition (on TIMS as  $\text{UO}_2$  for the 40 first, on a multi collector – inductively coupled plasma – mass spectrometer (MC-ICP-MS) as a metal for the latter). Most importantly, chemical abrasion procedures also differ, being 180°C for 12hrs (Lindskog et al., 2017) and 190°C for 15hrs (Liao et al., 2020).

The variation of the chemical abrasion procedure has profound effects on the U–Pb zircon isotopic systematics. The duration as well as the temperature of the chemical abrasion has significant impact on the potential to effectively remove structurally 50 damaged domains, which typically produce anomalously young dates (Huyskens et al., 2016; Keller et al., 2019; Mattinson, 2005; Widmann et al., 2019). Both of the aforementioned studies of the ‘Likhall’ bed utilised temperature lower than the most recent recommendation for the chemical abrasion procedure (McKanna et al., 2023a, 2023b; Widmann et al., 2019), which raises concerns about remnant Pb-loss domains present in the zircons analysed. Different chemical abrasion procedure may be variably effective in removing visible inclusion (e.g. apatite and/or melt inclusions) in the analysed zircon crystals.

55 The impact of tracer uncertainty is significantly lower than the 0.4% discrepancy between the absolute ages obtained from ‘Likhall’. Similarly, the variation of the instrumental setup for U isotope analysis does not seem to introduce significant offsets, although we cannot evaluate this with certainty, due to limited amount of comparable data. The  $^{206}\text{Pb}/^{238}\text{U}$  age of the natural reference zircon material Temora reported by Liao et al. (2020) from the mixed TIMS–MC-ICP-MS analysis (417.19±0.15 Ma) is in agreement with the most recent estimates of 417.310 ± 0.074 Ma (von Quadt et al., 2016) and 60 417.353±0.052 Ma (Schaltegger et al., 2021).

Thus, we can reasonably assume that the difference in the chemical abrasion procedure is the main source for the poor reproducibility between the two previously published studies of ‘Likhall’ zircons. Furthermore, there is a difference in data interpretation strategy of the two published datasets. Lindskog et al. (2017) put the emphasis on the largest, statistically valid,



weighted mean age plateau, whereas Liao et al. (2020) chose the youngest cluster of zircon U–Pb analyses. In the following, we will first explore different interpretation strategies of the existing data, such as *i*) looking for the largest statistically valid plateau, *ii*) the youngest cluster, *iii*) the duration of time recorded by the youngest and oldest zircon U–Pb date ( $\Delta t$ ) and *iv*) the youngest concordant single zircon U–Pb analysis. Ideally, applying the same interpretation methodology to both datasets should reduce the discrepancy of the absolute U–Pb ages. Furthermore, we add another set of U–Pb dates from the same material but apply the chemical abrasion procedure of Widmann et al. (2019), which should more effectively mitigate Pb-loss. Ultimately, we will suggest a revised age for the ‘Likhall’ bed.

## 2 Methods

Single grains of ‘Likhall’ zircon crystals free of visible inclusions and cracks were hand-picked under a binocular microscope at a magnification of  $\times 20$  to  $\times 40$  from the same petri dish as the material analyzed by Lindskog et al. (2017). The size of individual fragments was variable, with length ranging from  $\sim 50\mu\text{m}$  to  $\sim 300\mu\text{m}$ . The chemical abrasion procedures were 48hrs of annealing at  $900^\circ\text{C}$ , 12hrs partial dissolution at  $210^\circ\text{C}$ , as defined as optimal in Widmann et al. (2019). Individual zircon grains were washed in 3ml Savillex beakers in an ultrasonic bath,  $4\times$  in 7N  $\text{HNO}_3$ , transferred into individual 200 $\mu\text{L}$  Savillex microcapsules, along with 2–3 drops of  $\text{HF}_{\text{conc}}$  and 3.9–5.5 mg of a mixed  $^{202}\text{Pb}$ – $^{205}\text{Pb}$ – $^{233}\text{U}$ – $^{235}\text{U}$  tracer solution (ET2535, Condon et al., 2015; McLean et al., 2015), and dissolved at  $210^\circ\text{C}$  in a Parr bomb for 48hrs. After dissolution, samples were dried down on a hotplate at  $120^\circ\text{C}$ , re-dissolved in 3N HCl, and then U and Pb were separated using a single column anion exchange chemistry. Uranium and Pb were loaded on outgassed, zone-refined, single Re filaments with a silica-gel/phosphoric acid emitter solution (Gerstenberger and Haase, 1997).

Uranium and Pb isotopic compositions were measured on an IsotopX Phoenix TIMS at the University of Geneva. Lead was measured in dynamic mode using a Daly detector, U was measured as an oxide in static mode using Faraday cups coupled to  $10^{12}\Omega$  resistance amplifiers. Measured isotopic ratios were corrected for interferences of  $^{238}\text{U}^{18}\text{O}^{16}\text{O}$  on  $^{235}\text{U}^{16}\text{O}_2$  using a  $^{18}\text{O}/^{16}\text{O}$  composition of 0.00205, based on repeat measurements of the U500 standard. Mass fractionation of U was corrected using a double isotope tracer with a  $^{235}\text{U}/^{233}\text{U}$  of  $0.99506\pm 0.005$ . Mass fractionation of Pb is calculated and corrected using a  $^{202}\text{Pb}/^{205}\text{Pb}$  ratio of  $0.99923913\pm 0.00026555$  ( $1\sigma$ ) (Condon et al., 2015). Zircon Pb analyses were corrected for laboratory blanks, with a  $^{206}\text{Pb}/^{204}\text{Pb}$  of  $17.10\pm 0.21$ , a  $^{207}\text{Pb}/^{204}\text{Pb}$  of  $15.07\pm 0.11$  and a  $^{208}\text{Pb}/^{204}\text{Pb}$  of  $36.17\pm 0.25$  (all  $1\sigma$ ), based on repeat measurements of total procedural blanks for the zircon U–Pb column chemistry. All data were processed using the Tripoli v. 4.10 and Redux v. 3.7.1 U–Pb software (Bowring et al., 2012; McLean et al., 2011). Weighted mean U–Pb age uncertainties are reported at the  $2\sigma$  level in the format  $A\pm X/Y/Z$ , where A is the weighted mean age, X is analytical uncertainty, Y is analytical and tracer uncertainty combined, and Z is analytical, tracer, and decay constant uncertainties combined (Schoene et al., 2006). Thorium abundances for each grain, and subsequently  $\text{Th}/\text{U}_{\text{zircon}}$ , were calculated using the abundance of  $^{208}\text{Pb}$  within the crystal and the  $^{206}\text{Pb}/^{238}\text{U}$  age to calculate radiogenic in-growth (McLean et al., 2011). All U–Pb dates are corrected for initial  $^{230}\text{Th}$  disequilibrium, assuming a Th/U ratio of the magma of  $3.5\pm 1$ .



Repeat analyses of the ET100 solution ( $^{206}\text{Pb}/^{238}\text{U}$  date:  $100.173 \pm 0.003$  Ma; Schaltegger et al., 2021) yielded a value of  $100.1678 \pm 0.0046$  Ma (MSWD = 3.2,  $n = 32/40$ ), during the period of data collection. One batch comprised of eight consecutive ET100 samples was rejected, due to an anomalously young average age (batch internally consistent).

### 3 Results

100 A total of 22 zircons from the zircon-rich ‘Likhall’ bed were analysed for their U–Pb isotopic composition. The U and Pb isotopic data are presented in Table 1, interpreted U–Pb dates are illustrated in Concordia space in Fig. 1, revealing a large spread in  $^{206}\text{Pb}/^{238}\text{U}$  dates as well as variable discordance. The new data presented here comprise 15 analytically concordant and 7 discordant  $^{206}\text{Pb}/^{238}\text{U}$  zircon analyses, which range in  $^{206}\text{Pb}/^{238}\text{U}$  dates from  $468.8 \pm 1.2$  to  $462.43 \pm 0.27$  Ma. The ratio of radiogenic to common lead ( $\text{Pb}^*/\text{Pb}_c$ ) ranges from 11.1 to 79.7, with variable amounts of  $\text{Pb}_c$  (0.20 to 1.09 pg). The  $^{207}\text{Pb}/^{206}\text{Pb}$  105 dates range from  $461 \pm 10$  to  $490 \pm 15$  Ma.

The compilation of previously published zircon U–Pb analyses of the ‘Likhall’ bed comprises 17 analyses from Lindskog et al. (2021) and 21 analyses from Liao et al. (2020), which are now complemented by our 22 new analyses in this study. The  $^{206}\text{Pb}/^{238}\text{U}$  dates of all these datasets are plotted in Fig. 2, along with the weighted mean  $^{206}\text{Pb}/^{238}\text{U}$  age for each of the datasets following the selection criteria discussed below. All data are available in Table 1 and Supplement (Table S1).

110

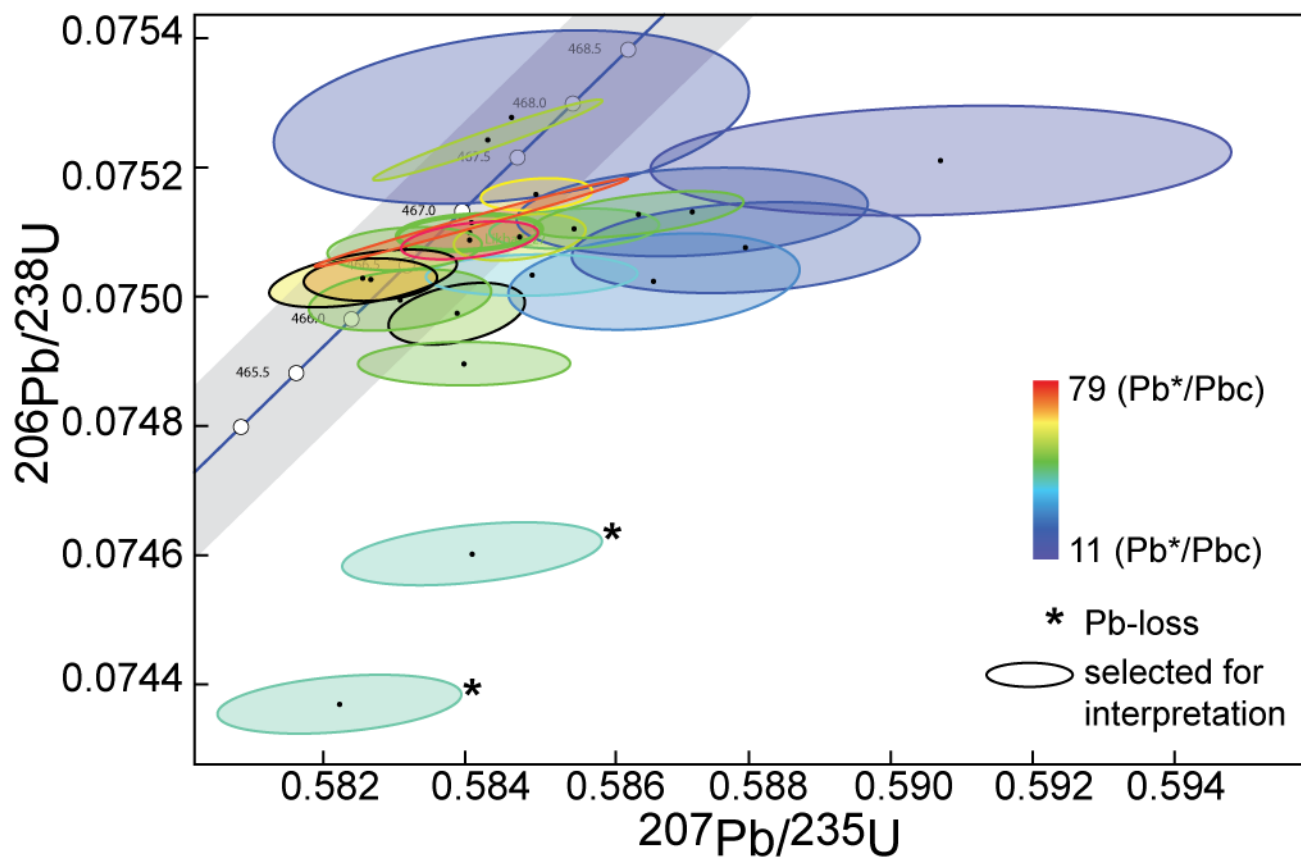

Fig. 1) Concordia diagram generated in ETRedux v. 3.7.1, using colour coding of the error ellipses as a function of the  $\text{Pb}^*/\text{Pb}_c$  value. Red colours indicate higher  $\text{Pb}^*/\text{Pb}_c$  whereas blue colours indicate low  $\text{Pb}^*/\text{Pb}_c$  values. Ellipses marked by an asterisk are interpreted to be affected by Pb-loss. Black outline indicates analyses considered for the weighted mean age, where the selection criterion is  $\text{Pb}^*/\text{Pb}_c > 50$  and analytical concordance (part or full ellipse overlaps with the uncertainty band of the Concordia curve). Grey band illustrates the uncertainty band of the Concordia curve.

115

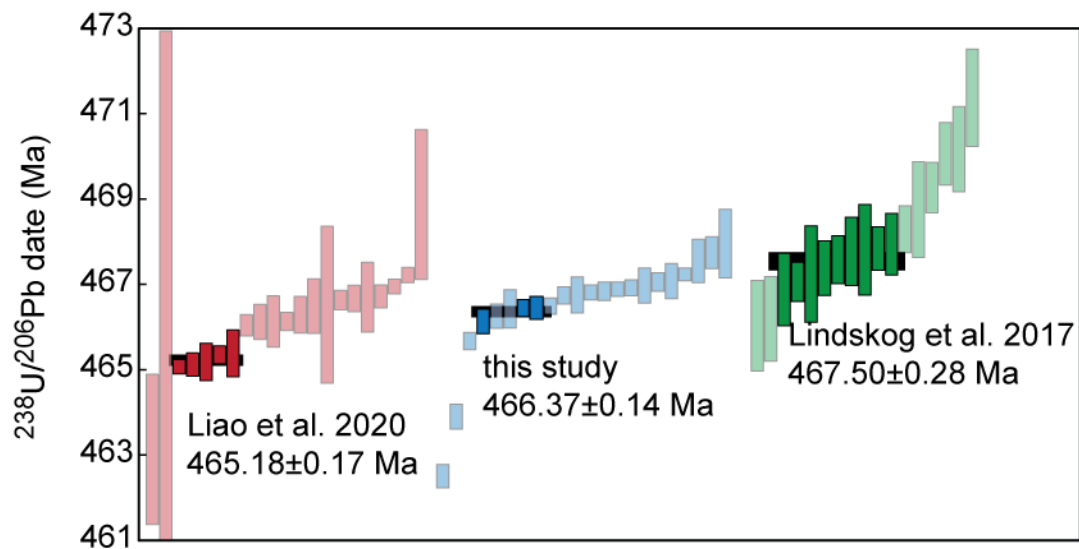

Fig. 2) Rank order plot of calculated  $^{238}\text{U}/^{206}\text{Pb}$  single zircon U-Pb dates from Liao et al (2020), this study and Lindskog et al (2017). Transparent bars were not considered for the calculation of the weighted mean age, as per each studies selection criteria (see text for more details).

120



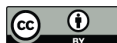

Table 1. U-Pb dates

| Zircon      | No. of Grains | Dates (Ma)                          |      |                       |      |                                     |     |                       |       |                                     |      | Composition                         |      |                       |      | Isotopic Ratios       |      |                                     |         |                                     |        |                                     |        | Corr. coef. |                                     |      |      |
|-------------|---------------|-------------------------------------|------|-----------------------|------|-------------------------------------|-----|-----------------------|-------|-------------------------------------|------|-------------------------------------|------|-----------------------|------|-----------------------|------|-------------------------------------|---------|-------------------------------------|--------|-------------------------------------|--------|-------------|-------------------------------------|------|------|
|             |               | <sup>206</sup> Pb/ <sup>238</sup> U | ±2σ  | <sup>206</sup> Pb/abs | ±2σ  | <sup>207</sup> Pb/ <sup>235</sup> U | ±2σ | <sup>207</sup> Pb/abs | ±2σ   | <sup>206</sup> Pb/ <sup>238</sup> U | ±2σ  | <sup>207</sup> Pb/ <sup>235</sup> U | ±2σ  | <sup>206</sup> Pb/abs | ±2σ  | <sup>207</sup> Pb/abs | ±2σ  | <sup>206</sup> Pb/ <sup>238</sup> U | ±2σ     | <sup>207</sup> Pb/ <sup>235</sup> U | ±2σ    | <sup>206</sup> Pb/ <sup>238</sup> U | ±2σ    |             | <sup>207</sup> Pb/ <sup>235</sup> U | ±2σ  |      |
|             |               | <Th>a                               | b    | c                     | b    | c                                   | b   | c                     | <Th>a | b                                   | c    | d                                   | e    | f                     | g    | h                     | i    | j                                   | k       | l                                   | m      | n                                   | o      | p           | q                                   | r    |      |
| Likhall     |               |                                     |      |                       |      |                                     |     |                       |       |                                     |      |                                     |      |                       |      |                       |      |                                     |         |                                     |        |                                     |        |             |                                     |      |      |
| Likhall_z14 | 1             | 462.51                              | 0.27 | 462.43                | 0.27 | 465.9                               | 1.1 | 465.9                 | 1.1   | 462.6                               | 6.2  | 483.0                               | 6.2  | 4.3                   | 19.7 | 0.59                  | 33.2 | 0.78                                | 1798.20 | 0.24                                | 0.0744 | 0.06                                | 0.5822 | 0.30        | 0.0568                              | 0.28 | 0.33 |
| Likhall_z18 | 1             | 463.90                              | 0.29 | 463.82                | 0.29 | 467.1                               | 1.2 | 467.1                 | 1.2   | 462.8                               | 6.5  | 483.2                               | 6.5  | 4.0                   | 24.3 | 0.75                  | 32.5 | 0.83                                | 1738.09 | 0.26                                | 0.0746 | 0.07                                | 0.5841 | 0.31        | 0.0568                              | 0.29 | 0.40 |
| Likhall_z17 | 1             | 465.67                              | 0.20 | 465.59                | 0.20 | 467.0                               | 1.0 | 467.0                 | 1.0   | 473.7                               | 5.7  | 474.1                               | 5.7  | 1.8                   | 24.9 | 0.63                  | 39.7 | 0.74                                | 2164.75 | 0.23                                | 0.0749 | 0.04                                | 0.5840 | 0.26        | 0.0566                              | 0.26 | 0.01 |
| Likhall_z6  | 1             | 466.13                              | 0.29 | 466.05                | 0.29 | 466.9                               | 0.6 | 467.0                 | 0.6   | 471.0                               | 3.4  | 471.4                               | 3.4  | 1.1                   | 42.7 | 0.85                  | 50.0 | 0.81                                | 2678.29 | 0.25                                | 0.0750 | 0.06                                | 0.5839 | 0.16        | 0.0565                              | 0.15 | 0.37 |
| Likhall_z1  | 1             | 466.25                              | 0.28 | 466.18                | 0.28 | 466.4                               | 0.8 | 466.4                 | 0.8   | 467.4                               | 4.7  | 467.7                               | 4.7  | 0.3                   | 43.3 | 1.08                  | 40.0 | 0.94                                | 2079.65 | 0.29                                | 0.0750 | 0.06                                | 0.5831 | 0.22        | 0.0564                              | 0.21 | 0.29 |
| Likhall_z8  | 1             | 466.43                              | 0.45 | 466.35                | 0.45 | 468.7                               | 1.3 | 468.7                 | 1.3   | 490.0                               | 7.5  | 480.4                               | 7.5  | 2.9                   | 20.7 | 0.95                  | 21.8 | 0.83                                | 1172.26 | 0.26                                | 0.0750 | 0.10                                | 0.5867 | 0.35        | 0.0567                              | 0.34 | 0.25 |
| Likhall_z16 | 1             | 466.44                              | 0.20 | 466.37                | 0.20 | 466.2                               | 0.6 | 466.2                 | 0.6   | 464.8                               | 3.6  | 465.2                               | 3.6  | -0.2                  | 20.6 | 0.30                  | 69.1 | 0.90                                | 3616.53 | 0.28                                | 0.0750 | 0.04                                | 0.5827 | 0.16        | 0.0564                              | 0.16 | 0.10 |
| Likhall_z26 | 1             | 466.46                              | 0.27 | 466.38                | 0.27 | 466.1                               | 0.8 | 466.1                 | 0.8   | 464.4                               | 4.5  | 464.8                               | 4.5  | -0.3                  | 19.1 | 0.32                  | 58.8 | 0.81                                | 3148.58 | 0.25                                | 0.0750 | 0.06                                | 0.5826 | 0.23        | 0.0563                              | 0.20 | 0.50 |
| Likhall_z11 | 1             | 466.49                              | 0.19 | 466.41                | 0.19 | 467.6                               | 1.0 | 467.6                 | 1.0   | 473.2                               | 5.6  | 473.6                               | 5.6  | 1.5                   | 22.6 | 0.76                  | 29.8 | 0.77                                | 1613.82 | 0.24                                | 0.0750 | 0.04                                | 0.5849 | 0.25        | 0.0566                              | 0.25 | 0.08 |
| Likhall_z7  | 1             | 466.74                              | 0.20 | 466.65                | 0.20 | 466.5                               | 0.7 | 466.5                 | 0.7   | 465.2                               | 4.0  | 465.6                               | 4.0  | -0.2                  | 37.6 | 0.93                  | 40.6 | 0.80                                | 2292.54 | 0.19                                | 0.0751 | 0.04                                | 0.5831 | 0.19        | 0.0564                              | 0.18 | 0.21 |
| Likhall_z4  | 1             | 466.75                              | 0.42 | 466.66                | 0.42 | 469.6                               | 1.6 | 469.6                 | 1.6   | 483.3                               | 9.0  | 483.7                               | 9.0  | 3.5                   | 15.1 | 0.90                  | 16.7 | 0.50                                | 974.48  | 0.16                                | 0.0751 | 0.09                                | 0.5880 | 0.42        | 0.0568                              | 0.41 | 0.20 |
| Likhall_z28 | 1             | 466.81                              | 0.18 | 466.73                | 0.18 | 467.1                               | 0.6 | 467.1                 | 0.6   | 468.3                               | 3.4  | 468.7                               | 3.4  | 0.4                   | 16.2 | 0.20                  | 79.7 | 0.79                                | 4278.16 | 0.25                                | 0.0751 | 0.04                                | 0.5841 | 0.17        | 0.0564                              | 0.15 | 0.41 |
| Likhall_z22 | 1             | 466.84                              | 0.22 | 466.76                | 0.22 | 467.5                               | 0.6 | 467.5                 | 0.6   | 470.9                               | 3.3  | 471.3                               | 3.3  | 1.0                   | 25.1 | 0.45                  | 55.7 | 0.83                                | 2959.58 | 0.26                                | 0.0751 | 0.05                                | 0.5848 | 0.16        | 0.0565                              | 0.15 | 0.32 |
| Likhall_z13 | 1             | 466.88                              | 0.17 | 466.80                | 0.17 | 467.1                               | 0.7 | 467.1                 | 0.7   | 468.0                               | 3.8  | 468.4                               | 3.8  | 0.3                   | 39.3 | 0.86                  | 45.8 | 0.74                                | 2495.63 | 0.23                                | 0.0751 | 0.04                                | 0.5841 | 0.17        | 0.0564                              | 0.17 | 0.21 |
| Likhall_z10 | 1             | 466.92                              | 0.19 | 466.84                | 0.19 | 468.0                               | 0.8 | 468.0                 | 0.8   | 473.4                               | 4.4  | 473.8                               | 4.4  | 1.5                   | 32.6 | 0.87                  | 37.6 | 0.76                                | 2041.61 | 0.24                                | 0.0751 | 0.04                                | 0.5855 | 0.20        | 0.0566                              | 0.20 | 0.19 |
| Likhall_z27 | 1             | 466.97                              | 0.41 | 466.90                | 0.41 | 467.1                               | 1.4 | 467.1                 | 1.4   | 467.6                               | 6.4  | 468.0                               | 6.4  | 0.2                   | 14.6 | 0.20                  | 71.5 | 0.88                                | 3759.65 | 0.27                                | 0.0751 | 0.09                                | 0.5841 | 0.38        | 0.0564                              | 0.29 | 0.99 |
| Likhall_z24 | 1             | 467.05                              | 0.22 | 466.97                | 0.22 | 468.6                               | 0.9 | 468.6                 | 0.9   | 476.2                               | 5.1  | 476.6                               | 5.1  | 2.0                   | 13.6 | 0.32                  | 42.2 | 0.69                                | 2328.76 | 0.22                                | 0.0751 | 0.05                                | 0.5864 | 0.25        | 0.0566                              | 0.23 | 0.55 |
| Likhall_z3  | 1             | 467.07                              | 0.41 | 466.99                | 0.41 | 469.1                               | 1.6 | 469.1                 | 1.6   | 476.9                               | 9.2  | 473.3                               | 9.2  | 2.6                   | 16.2 | 0.93                  | 17.4 | 0.73                                | 956.08  | 0.23                                | 0.0751 | 0.09                                | 0.5872 | 0.42        | 0.0567                              | 0.41 | 0.18 |
| Likhall_z12 | 1             | 467.23                              | 0.15 | 467.16                | 0.15 | 467.7                               | 0.5 | 467.7                 | 0.5   | 469.8                               | 2.9  | 470.2                               | 2.9  | 0.6                   | 59.8 | 0.98                  | 61.0 | 0.85                                | 3226.59 | 0.27                                | 0.0752 | 0.03                                | 0.5850 | 0.13        | 0.0565                              | 0.13 | 0.21 |
| Likhall_z9  | 1             | 467.55                              | 0.51 | 467.47                | 0.51 | 471.3                               | 2.6 | 471.3                 | 2.6   | 489.7                               | 15.1 | 490.1                               | 15.1 | 4.6                   | 12.1 | 1.09                  | 11.1 | 0.88                                | 596.94  | 0.27                                | 0.0752 | 0.11                                | 0.5907 | 0.69        | 0.0570                              | 0.68 | 0.16 |
| Likhall_z25 | 1             | 467.74                              | 0.37 | 467.66                | 0.37 | 467.2                               | 1.0 | 467.2                 | 1.0   | 464.7                               | 4.4  | 465.1                               | 4.4  | -0.5                  | 14.0 | 0.26                  | 53.3 | 0.75                                | 2892.65 | 0.23                                | 0.0752 | 0.08                                | 0.5843 | 0.28        | 0.0563                              | 0.19 | 0.97 |
| Likhall_z2  | 1             | 467.95                              | 0.80 | 467.87                | 0.80 | 467.4                               | 2.1 | 467.4                 | 2.1   | 464.9                               | 12.1 | 465.3                               | 12.1 | -0.5                  | 14.2 | 1.02                  | 14.0 | 0.80                                | 762.54  | 0.25                                | 0.0753 | 0.18                                | 0.5846 | 0.57        | 0.0564                              | 0.55 | 0.23 |

a Corrected for initial Th/U disequilibrium using radiogenic <sup>206</sup>Pb and Th/U[magma] = 3.5.  
 b Isotopic dates calculated using  $\lambda^{238} = 1.55125E^{-10}$  (Jaffey et al. 1971) and  $\lambda^{235} = 9.8485E^{-10}$  (Jaffey et al. 1971).  
 c Corrected for initial Pa/U disequilibrium using initial fraction activity ratio [<sup>231</sup>Pa]/[<sup>235</sup>U] = 1.  
 d % discordance = 100 - (100 \* (<sup>206</sup>Pb/<sup>238</sup>U date) / (<sup>206</sup>Pb/<sup>238</sup>U date))  
 e Total mass of radiogenic Pb.  
 f Total mass of common Pb.  
 g Ratio of radiogenic Pb (including <sup>206</sup>Pb) to common Pb.  
 h Th contents calculated from radiogenic <sup>206</sup>Pb and <sup>231</sup>Th-corrected <sup>206</sup>Pb/<sup>238</sup>U date of the sample, assuming concordance between U-Pb-Th systems.  
 i Measured ratio corrected for fractionation and spike contribution only.  
 j Measured ratios corrected for fractionation, tracer and blank.

Tab. 1) U-Pb ID-TIMS measurement results of individual zircons from the 'Likhall' bed.

#### 4 Geological Setting

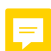

125 The Baltoscandian region was largely covered by an epeiric sea throughout much of the Ordovician, leaving behind a sedimentary record mainly in the form of mudstones, shales, and limestones (e.g., Nielsen et al., 2023, and references therein). In the Lower–Middle Ordovician, the continent Baltica was at a relatively high latitudinal position and any relief of the regional Precambrian basement was near-completely smoothed out. These conditions limited terrigenous input into the basin, and sedimentation rates were typically low (a few mm/ka). The regional intra-cratonic Ordovician succession is therefore relatively

130 thin. Volcanic dust may have contributed a relatively large proportion of the non-carbonate sedimentary materials (Lindstrom,



1974). The Middle Ordovician (Dapingian–Darrivilian) was mainly characterized by widespread deposition of cool-water carbonate sediments, in Sweden commonly referred to as the ‘orthoceratite limestone’ (e.g., Lindskog and Eriksson, 2017). The Ordovician succession of Baltoscandia contains numerous bentonite beds of varying thickness and lateral distribution, the most prominent of which occur in the Upper Ordovician (e.g., Ballo et al., 2019; Bergström, 1989; and references therein).  
135 Few of the bentonite beds have been isotopically dated, and even fewer so using modern techniques such as CA-ID-TIMS. Some carbonate beds in the ‘orthoceratite limestone’ contain abundant zircon, and the crystal characteristics and U–Pb age data of the grains indicate a volcanic origin (Lindskog et al. 2017; Liao et al. 2020). Thus, the zircon-rich beds arguably represent ‘crypto-tephra’ (McLaughlin et al., 2023).

The table-mountain Kinnekulle in the province of Västergötland, south-central Sweden, hosts a relatively expanded  
140 ‘orthoceratite limestone’ succession (e.g., Lindskog and Eriksson, 2017). These rocks have been the target of several studies of, e.g., paleontology, sedimentology, and geochemistry (e.g., Ahlberg et al., 2023, and references therein). Our sample materials derive from the Thorsberg quarry on eastern Kinnekulle (WGS84 coordinates 58.579167, 13.429444), from a distinct, gray-colored interval traditionally referred to as the ‘Täljsten’ (‘carving stone’) by local quarrymen. In more detail, the sample derives from a specific bed referred to as ‘Likhall’ (‘corpse slab’), which has shown to contain very abundant zircon  
145 grains (Lindskog et al. 2017; Liao et al. 2020). The biostratigraphic context of this c. 10 cm thick bed is very well known, and its base coincides with that of the geographically widely distributed *Yangtzeplacognathus crassus* conodont Zone in the middle Darrivilian (for more details, see Lindskog et al. 2017).

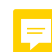

## 5 Discussion

### 5.1 Radiogenic Pb/common Pb ratio ( $Pb^*/Pb_c$ ) as a selection criterion:

150 The color coding of the data ellipses in Fig. 1 indicates that the majority of the analyses plot onto or near the concordia within its uncertainty band. Analyses with low  $Pb^*/Pb_c$  (<50) have significantly higher scatter in both  $^{206}Pb/^{238}U$  and  $^{207}Pb/^{235}U$  ratios. Subsequently, we only use high  $Pb^*/Pb_c$  (>50) analyses for our age interpretation and will also apply this strategy to the previously published datasets. The accuracy of  $^{206}Pb/^{238}U$  dates is highest at  $Pb^*/Pb_c >15$ –20 (Chaltegger et al., 2021), which is the case for most of our analyses that underwent chemical abrasion for 12hrs at 210°C, and for some of the analyses of Liao  
155 et al. (2020) abraded for 15hrs at 190°C (Fig. 3). Contrastingly, a major part of the Lindskog et al. (2017) dates abraded for 12hrs at 180°C plot below this threshold at very variable  $^{206}Pb/^{238}U$  dates.

Adopting the  $Pb^*/Pb_c$  as a criterion for data selection is an important step towards greater accuracy. The data of Lindskog et al. (2017) shows significant correlation between  $Pb^*$  and  $Pb_c$  (Fig. 4), at overall high  $Pb_c$  values (up to ~6 pg), which makes us believe that some indiscernible mineral inclusions were not removed during chemical abrasion. Chemical abrasion at higher  
160 temperature is likely to access and dissolve these (McKanna et al., 2023a), and would reduce the total  $Pb_c$ , if it primarily originated from inclusions. Subsequently, we would then use only low-blank or high  $Pb^*/Pb_c$  (>50) analyses to make an age interpretation.

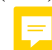

The high  $Pb_c$  concentrations of the Lindskog et al. (2017) analyses (up to 5.99 pg), suggest that the conditions during the chemical abrasion procedure were not sufficient to remove the inclusions that are clearly visible in the grain separate (Lindskog et al., 2017), leading to generally low  $Pb^*/Pb_c$ .

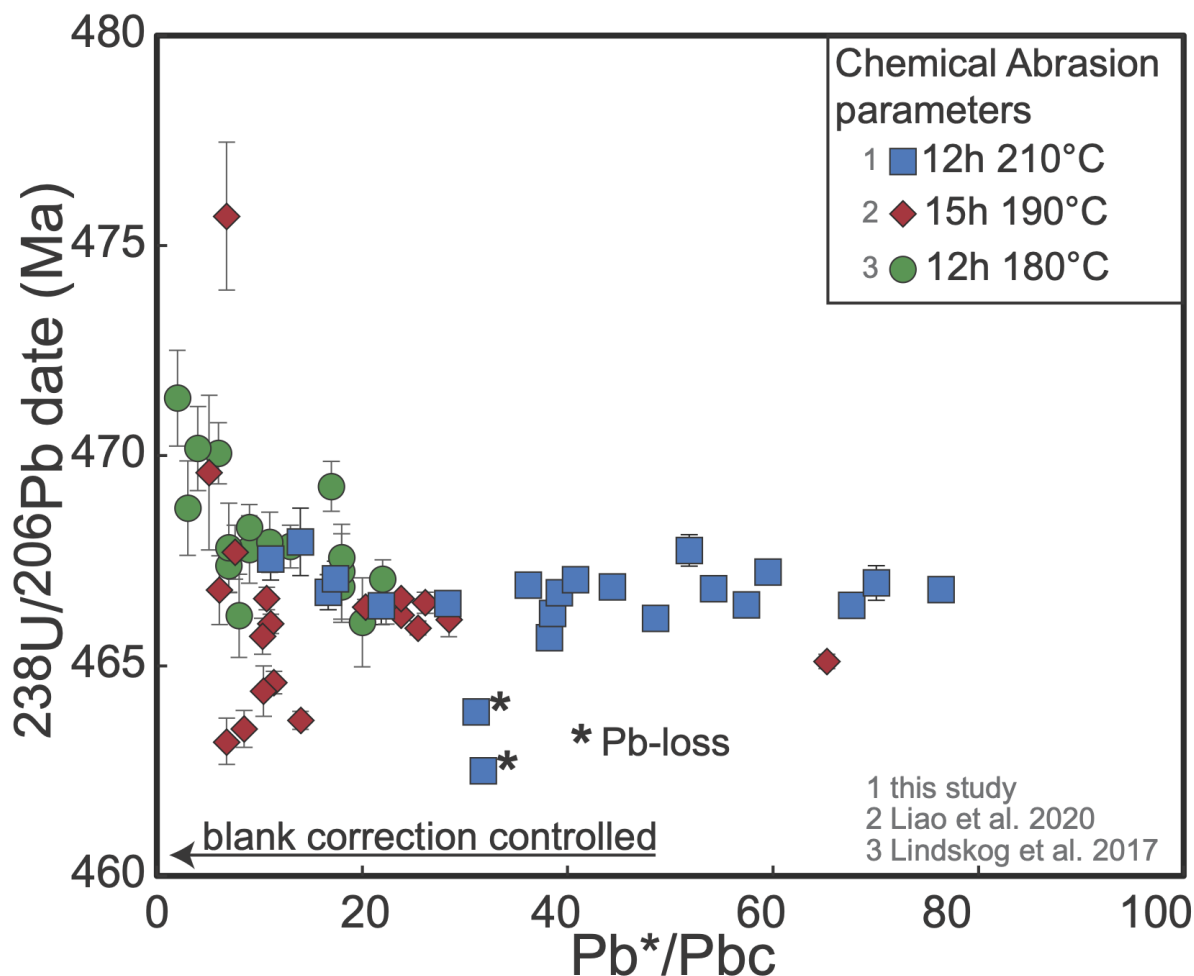

Fig. 3) Comparison of calculated  $^{238}U/^{206}Pb$  zircon dates with their respective  $Pb^*/Pb_c$  values. Low  $Pb^*/Pb_c$  values typically indicate stronger effects of blank correction on the calculated  $^{238}U/^{206}Pb$  dates (Schaltegger et al. 2021). Colours indicate the different studies and differences in their chemical abrasion procedure. Samples marked with an asterisk are discordant in concordia space (see Fig. 1).

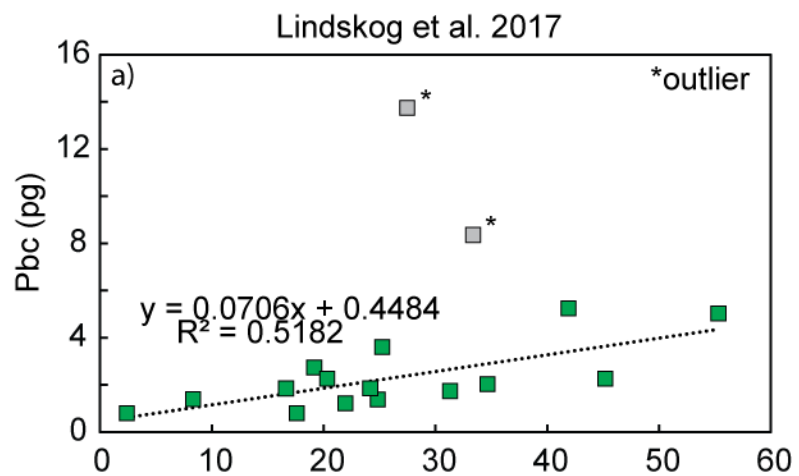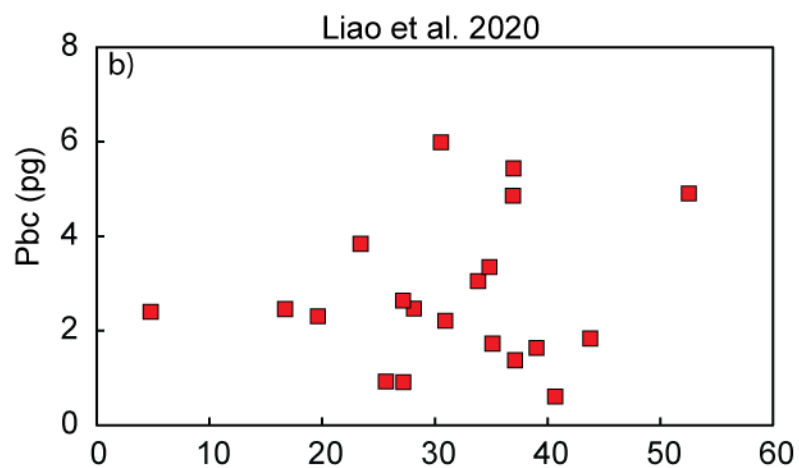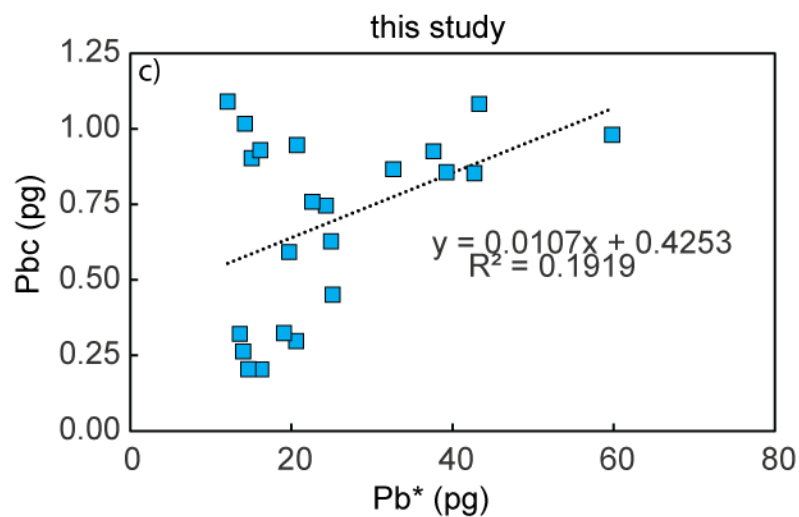

175 **Fig. 4) Comparison of  $Pb_c$  vs  $Pb^*$  of a) the Lindskog et al. (2017) study, b) the Liao et al. (2020) study and c) this study. Neither study exhibits simple correlation without outlier rejection. A positive correlation between  $Pb_c$  and  $Pb^*$  may indicate presence of inclusions (mineral and/or melt), which were not removed during the chemical abrasion process.**

## 5.2 Residual Pb-loss in chemically abraded natural zircon:

In natural zircons,  $\alpha$ -decay damage induced partial Pb-loss is one reason for normally discordant U–Pb data (Mezger and Krogstad, 1997). This effect may be mitigated by removing decay damaged (metamict) portions of the zircon grains using the chemical abrasion procedure (Mattinson, 2005). Subsequently, if all Pb-loss domains were removed, the isotopic analysis should yield an analytically concordant result for both the  $^{206}Pb$ – $^{238}U$  and  $^{207}Pb$ – $^{235}U$  decay series, respectively. Such information can then be related to the age of eruption or solidification, while the range of U–Pb may be a measure of the duration of crystallisation of zircon in a magma. However, the chemical abrasion may not have removed 100% of metamict portions and some domains with partial Pb-loss may still be present in the grain (so-called residual Pb-loss). This may be the case even if the optimal calibration of the chemical abrasion procedure (12hrs at 210°C, Widmann et al., 2019) is utilized. Previous work has shown that natural zircon reference materials (Temora and GJ-1) treated at 180°C and 210°C for 12hrs retains excess scatter in their U–Pb systematics, restricting repeatability confidence to ca. 0.1% of the absolute age, while synthetic solutions offer a repeatability at a precision of up to 0.01% in the same study (Schaltegger et al., 2021). When comparing the effects of different chemical abrasion temperatures, Huyskens et al. (2016) found that temperatures of 190°C and lower may yield incomplete removal of Pb-loss domains, in agreement with later experiments (e.g. Widmann et al., 2019; Schaltegger et al., 2021). Such an effect of incomplete removal of metamict domains biased by Pb-loss may possibly be detected through analytical discordance between the two decay schemes, provided that the analytical precision, especially of the  $^{207}Pb/^{235}U$  decay series, was sufficient.

Between the previously published age estimates for the ‘Likhall’ bed by Lindskog et al. (2017) (467.50±0.28 Ma) and Liao et al. (2020) (465.18±0.17 Ma), there is a discrepancy of ca. 0.4% between the proposed U–Pb ages (Fig. 2). The two studies differ in their chemical abrasion protocols: Lindskog et al. (2017) utilised a 180°C and 12hrs procedure, whereas Liao et al. (2020) utilised a 190°C and 15hrs procedure. Both of these protocols diverge from the Widmann et al. (2019) parameters and we must consider the potential that these analyses included relict domains of Pb-loss, that may bias the U–Pb dates towards younger dates for both studies. Curiously, for the first case, the lower T abrasion resulted in (on average) older interpreted zircon U–Pb data (Lindskog et al., 2017), an effect we will explore in the next section discussing blank corrections.

Both the Lindskog et al. (2017) and Liao et al. (2020) datasets show very little evidence for normal discordance, as analyses which are technically discordant are typically older than the interpreted U–Pb age, suggesting inheritance rather than Pb-loss. Normal discordance can be masked if the analytical precision is insufficient, in particular when the measured  $^{207}Pb$  intensity is low. In our new data we observe two discordant analyses that are by ~2–4 Ma (Fig. 1) younger than the previous age estimates (Lindskog et al., 2017; Liao et al., 2020). We therefore infer that the data of Liao et al. (2020) and Lindskog et al.

(2017) were affected by Pb-loss domains and/or relict inclusions that were not penetrated during chemical abrasion. Relict inclusions have an unknown amount of  $Pb_c$  and its composition cannot be assessed by ID-TIMS data. This could result in erroneous blank composition corrections, which may result in older U–Pb dates. Therefore, we base our discussion and interpretation on those data that are the least affected by Pb blank correction.

### 210 5.3 Lead blank isotopic composition correction effects on the spread of zircon U–Pb dates:

One of the fundamental assumptions in zircon U–Pb geochronology is that zircon does not incorporate Pb during crystallisation and therefore does not contain initial common Pb (which can be monitored through analysis of  $^{204}Pb$ ) (Watson et al., 1997). Therefore, all zircon U–Pb analyses can be corrected for the presence of common Pb through measurement of  $^{204}Pb$  during data acquisition, assuming that all  $Pb_c$  is derived from the procedural blank, by adopting the mean isotopic composition from repeat analysis of procedural blank measurements. The uncertainty of this mean blank isotopic composition is propagated into the U–Pb date calculation (Schmitz and Schoene, 2007). An accurate correction of blank Pb thus results in a more precise and accurate U–Pb dates. Conversely, inaccurate blank corrections may result in apparently too old or young U–Pb dates, if the  $Pb^*/Pb_c$  is low (Schaltegger et al., 2021).

In the Lindskog et al. (2017) dataset, a significant proportion of the analytical uncertainty is controlled by the Pb blank composition correction, as  $Pb^*/Pb_c$  ratios range from 2 to 22, while the Liao et al. (2020) dataset ranges from 2 to 30 (plus one high value at 67). In our new dataset, we observe  $Pb^*/Pb_c$  from 11 to 78. When we compare the  $^{206}Pb/^{238}U$  zircon U–Pb dates with their  $Pb^*/Pb_c$  (Fig. 3), we observe that the Lindskog et al. (2017) data exhibit a slightly negative correlation, whereas the Liao et al. (2020) are scattering. However, we observe in the Liao et al. (2020) data that the youngest analyses are consistently associated with lower  $Pb^*/Pb_c$ , with the exception of the analysis with the highest  $Pb^*/Pb_c$  which is also relatively young (Fig. 3). In our newly acquired dataset, correlation between  $^{206}Pb/^{238}U$  zircon U–Pb date with its  $Pb^*/Pb_c$  is absent, suggesting that blank correction does not introduce significant bias (Fig. 3).

The strong correlation between  $Pb^*$  and  $Pb_c$  ( $R^2$  of 0.52 after rejecting two outliers;  $Pb^*$  max = 55.33 pg and  $Pb_c$  max = 5.24 pg) in the Lindskog et al. (2017) dataset is concerning (Fig. 4), as it implies that the analysed zircons contained inclusions that were not removed during the chemical abrasion procedure. Evidence for potential inclusions (before chemical abrasion) is provided by imaging of zircon crystals analysed by Lindskog et al. (2017) and Liao et al. (2020), matching our observations during mineral selection. If we assume that larger zircons contain more  $Pb^*$  and a larger volume of  $Pb_c$ -bearing inclusions, this would explain why the Lindskog et al. (2017) dataset exhibits a negative correlation between  $Pb^*/Pb_c$  and  $^{206}Pb/^{238}U$  dates. The slope of the correlation between  $Pb^*/Pb_c$  and  $^{206}Pb/^{238}U$  dates is controlled by the difference between the “true”  $Pb_c$  composition and the assigned  $Pb_c$  composition for blank correction. In the Liao et al. (2020) dataset, correlation between  $Pb^*$  and  $Pb_c$  is absent, but measured  $Pb^*/Pb_c$  are comparable to those of Lindskog et al. (2017; Fig. 4). Our new dataset does not show any correlation between  $Pb^*$  and  $Pb_c$  ( $Pb^*$  max = 59.80 pg and  $Pb_c$  max = 1.09 pg; Fig. 4) nor between  $Pb^*/Pb_c$  and  $^{206}Pb/^{238}U$  date (Fig. 3).



240 Some of the low  $Pb^*$  zircons in our new data also have elevated blanks, causing scatter in the low  $Pb^*$  analyses systematics, whereas all the high  $Pb^*$  analyses associate with slightly higher blanks. We therefore consider it likely that the  $Pb_c$  is primarily controlled by un-resolved inclusion (transparent, mineral and/or melt). These observations are in line with the observations by McKanna et al. (2023a) and the Lindskog et al. (2017) data (Fig 4a), that chemical abrasion at high temperatures is necessary to effectively remove inclusions that are deeply seated within the zircon crystal.

#### 5.4 The impact of the interpretation strategy on U–Pb zircon ages

245 Correlation between U–Pb [date](#) and  $Pb^*/Pb_c$  has implications for interpreting the absolute age of the ‘Likhall’ bed. Several different interpretation strategies exist, such as i) weighted mean of a subset of data (e.g. Lindskog et al. 2017), ii) youngest cluster of overlapping analyses at  $2\sigma$  (e.g. Liao et al., 2020), iii) considering the entire range of concordant zircon U–Pb analyses as autocrystic growth within the magma chamber (Samperton et al., 2015), iv) considering the youngest concordant analysis as best proxy for the timing of eruption and v) applying a stochastic (Bayesian) sampling approach (Keller et al., 250 2018). We discuss in the following the impact of interpretation scenarios i–iv on the suggested age for the ‘Likhall’ bed (v is beyond the scope of this study). Analytical effects such as using variable or inaccurate blank isotopic composition and the presence of  $Pb_c$ -rich inclusions, together with the presence of residual Pb-loss and minor inheritance of old radiogenic Pb, add to any of the further discussed discrepancies.  

##### 5.4.1 i) Subset interpretation

255 Lindskog et al. (2017) preferred a data interpretation based on the statistically most robust weighted mean age, representing the largest number of statistically valid analyses, which results in  $467.50 \pm 0.28$  Ma (MSWD = 1.4,  $n = 9$ , published value rejecting two younger and six older, concordant analyses). Applying the same strategy to the Liao et al. (2020) dataset, we obtain  $466.34 \pm 0.20$  Ma (MSWD = 0.99,  $n = 12$ ), rejecting five younger and three older analyses. For our new dataset, the result would be  $466.875 \pm 0.074$  Ma (MSWD = 0.87,  $n = 9$ ), rejecting 3 discordant analyses, 6 younger analyses and 5 older 260 analyses. The maximum difference between the absolute ages amounts to 0.25%, which is better than the difference of 0.4% of the previously published values. The lowest discrepancy is achieved between Liao et al. (2020) and our dataset, with a difference of 0.11%. 

##### 5.4.2 ii) Youngest cluster interpretation

Liao et al. (2020) preferred an interpretation based on the youngest, statistically valid age cluster, which resulted in 265  $465.18 \pm 0.17$  (MSWD = 1.3,  $n = 5$ , published value). For the Lindskog et al. (2017) data, this approach results in  $466.96 \pm 0.30$  Ma (MSWD = 1.5,  $n = 6$ ). For our new dataset, the corresponding result is  $466.43 \pm 0.11$  (MSWD = 5,  $n = 5$ ). The resulting



maximum spread is 0.38%, close to the published discrepancy of 0.4%. The lowest discrepancy is achieved between Lindskog et al. (2017) and our dataset, with a difference of 0.11%.

#### 5.4.3 iii) range of concordant zircon U–Pb dates

270 The duration of zircon crystallisation in a magma chamber is of interest for studies involving magma chamber dynamics and  
crustal evolution and we here compare the  $\Delta t$  defined as spread between youngest and oldest (concordant) zircon U–Pb  
analysis. The  $\Delta t$  for the Lindskog dataset is 5.35, Liao et al. (2020) is 3.8 (rejecting two outliers marked by Liao et al. (2020))  
and our new dataset is 1.82 (rejecting 3 young discordant data points) – results which differ significantly from each other. One  
possible explanation could be the unresolved inclusions and resultant low  $Pb^*/Pb_c$ , which can result in calculated too young  
275 or too old dates, augmenting natural spreads in zircon U–Pb dates. The maximum difference between the three datasets is  
194%, suggesting that interpretation is problematic with respect to the duration of magma chamber activity.

#### 5.4.4 iv) youngest concordant zircon U–Pb analysis

The youngest concordant zircon U–Pb analysis interpretation can be useful in volcanic samples. Here, the base assumption is  
that zircon continuously crystallises in the magma, and the youngest zircon represents the best proxy to the timing of eruption.  
280 In this regard, for Liao et al. (2020) the youngest concordant zircon U–Pb analysis is  $465.07 \pm 0.17$  Ma, for Lindskog et al.,  
(2017) it is  $466.03 \pm 1.06$  Ma and for our new dataset it is  $466.05 \pm 0.29$  Ma. The maximum difference between the three datasets  
is 0.21%, better than the discrepancy of the published U–Pb dates. There is a near indistinguishable difference between the  
Lindskog et al. (2017) and our youngest zircon U–Pb analyses (0.004%).

#### 5.5 Which strategy to choose?

285 It becomes clear from Fig. 2 that the three datasets were obtained under different analytical regimes in different labs. Among  
the differences is an improvement in analytical precision (increase of  $Pb^*/Pb_c$  through blank reduction). This will help to  
narrow down the duration of zircon growth in the magma system prior to eruption and leads to more reliable identification of  
autocrystic vs. antecrystic zircon. Identifying Pb-loss remains challenging in the older datasets, which utilized partial  
dissolution procedures at lower temperature and/or of shorter duration. Any assessment is particularly difficult when  
290 supporting information such as blank isotopic composition is absent. Furthermore, low  $Pb^*/Pb_c$  obscure discordance between  
the two decay series, due to elevated  $^{207}Pb/^{235}U$  uncertainty. The two datasets produced with the EARTHTIME isotopic tracer  
ET2535 show better comparability despite divergent chemical abrasion procedures, pointing to a systematic effect of different  
tracer calibration as well. However, the largest difference in age is caused by the varying approaches to data interpretation. If  
the same strategy is chosen, the discrepancy between the proposed U–Pb age in the two previously published studies and the  
295 present one significantly decreases.





We can conclude that  $Pb^*/Pb_c$  is of fundamental importance for the ‘Likhall’ zircon datasets. If we, for example, consider only analyses that are characterised by  $Pb^*/Pb_c > 50$  – i.e., a value where zircon dates are barely affected by blank correction – we would have to reject the entire Lindskog et al. (2017) dataset and all but one analysis from the Liao et al. (2020) study, and it leaves only 8 out of 22 analyses from our new dataset. Adopting this reduced dataset for interpretation yields the following results: i) the largest number of overlapping U–Pb dates forms a weighted mean of  $466.76 \pm 0.12$  Ma, ii) the youngest cluster is  $466.37 \pm 0.14$  Ma, iii) the  $\Delta t$  reduces to 780 kyrs, which is more consistent with predictions of thermal models for magma chambers (e.g., Caricchi et al., 2016; Weber et al., 2020), and iv) the youngest concordant zircon analysis remains unchanged at  $466.05 \pm 0.29$  Ma. The maximum difference between interpretations i), ii) and iv) is 0.15%, close to desired reproducibility value of 0.1% for natural reference materials (Schaltegger et al., 2021). More rigorous filtering based on  $Pb^*/Pb_c$  thus yields a more coherent dataset between the three studies, however, at low n-value.

Therefore, we propose that the weighted mean age of the youngest cluster of three high- $Pb^*/Pb_c$  analyses at  $466.37 \pm 0.14/0.18/0.53$  Ma (analytical/ +tracer/ +decay constant uncertainty; MSWD=1.9, n=3) has the highest probability for being an accurate age estimate for the ‘Likhall’ bed.

### 5.6 Implications for the Ordovician timescale and the absolute timing of events

In the Geological Time Scale 2020 (GTS2020), the level corresponding to ‘Likhall’, i.e., the basal *Yangtzeplacognathus crassus* conodont Zone, is placed at c. 469 Ma (Goldman et al., 2020, figure 20.3). This is well outside our new age estimate of  $466.37 \pm 0.14/0.18/0.53$  Ma (as well as of those of Lindskog et al., 2017 and Liao et al., 2020), which may warrant some adjustment of the Ordovician timescale – especially so as the range of the *Y. crassus* Zone in the GTS2020 scheme does not even overlap with our age estimate. The revised age for ‘Likhall’ further suggests that the timing of the L-chondrite breakup event in space, as interpreted based on ‘fossil’ meteorites and chromite abundance, should be placed at c. 467.1 Ma (cf. Lindskog et al. 2017; Liao et al. 2020; and references therein).

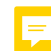

### 6 Conclusions

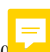

1) Our new high-precision  $^{207}Pb/^{238}U$  data set of the ‘Likhall’ zircon population represents an analytical improvement over previously published results: (a) higher analytical precision allows for identification of normal discordance in young analyses, (b) the presence of residual Pb-loss despite application of the currently considered optimal parameters for chemical abrasion ( $210^\circ\text{C}$  for 12hrs; Widmann et al., 2019) suggests that previous data acquired at lower chemical abrasion temperatures were (likely more) affected by Pb-loss domains; (c) our new data show higher  $Pb^*/Pb_c$  and therefore are less affected by the choice of isotopic composition used for blank correction. The elevated  $Pb_c$  in the former studies is suggested to be due to incomplete removal of  $Pb_c$ -rich inclusions during chemical abrasion.

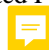

2) The choice of the data interpretation strategy is the main reason for the discrepancies between datasets from the three different laboratories (Lindskog et al., 2017; Liao et al., 2020; and the present study), particularly in cases where elevated  $Pb_c$



causes decreased analytical precision. Further reduction of the reproducibility between these studies is caused by the use of different tracer solutions and their respective calibrations.

330 3) The difference in interpreted age drastically decrease when only data subsets with high  $Pb^*/Pb_c$  are considered. For the data sets considered here, this implies an empirical  $Pb^*/Pb_c$  threshold of 50. For analyses with  $Pb^*/Pb_c > 50$ , the weighted mean (youngest cluster) U–Pb zircon age for the ‘Likhall’ bed is  $466.37 \pm 0.14/0.18/0.53$  (analytical/+tracer/+decay constant uncertainties), suggesting that previously published U–Pb ages are inaccurate.

335 4) The efficient removal of Pb-loss domains and micro inclusions is of paramount importance for achieving an accurate U–Pb date. Considering the presence of discordant, young analyses in our Ordovician-age dataset despite chemical abrasion conditions that are considered to be optimal, there is incentive to further develop the chemical abrasion procedure.

5) Considering biostratigraphic aspects, compared to GTS2020, the revised age of the ‘Likhall’ bed necessitates significant internal adjustment of the Ordovician timescale.

#### Author Contributions

Conceptualization: André N. Paul, Anders Lindskog, Urs Schaltegger

340 Data Curation & Formal Analysis: André N. Paul

Funding Acquisition: Anders Lindskog and Urs Schaltegger

Investigation: André N. Paul, Anders Lindskog, Urs Schaltegger

Visualization: André N. Paul and Anders Lindskog

Writing – Original Draft Preparation: André N. Paul

345 Writing – Review & Editing: André N. Paul, Anders Lindskog, Urs Schaltegger

#### Declaration of Competing Interests

The authors declare that they have no conflict of interest.

#### Acknowledgments

A.L. acknowledges funding from the Birgit and Hellmuth Hertz’ Foundation and the Royal Physiographic Society of Lund.

350 This study benefitted from SNFNS grant CRSII5\_180253 awarded to U.S.

#### References

Ahlberg, P., Calner, M., Lehnert, O., Wickström, L., Lindskog, A., 2023. Regional geology of Västergötland Province, Sweden, in: Field Guide for the ISOS 14 Post-Conference Excursion. Geologiska Föreningen Specialpublikation. pp. 9–12.



- Ballo, E.G., Augland, L.E., Hammer, Ø., Svensen, H.H., 2019. A new age model for the Ordovician (Sandbian) K-bentonites in Oslo, Norway. *Palaeogeogr. Palaeoclimatol. Palaeoecol.* 520, 203–213. <https://doi.org/10.1016/J.PALAEO.2019.01.016>
- Bergström, S.M., 1989. Use of graphic correlation for assessing event-stratigraphic significance and trans-Atlantic relationships of Ordovician K-bentonites. *Proc. Acad. Sci. Est. SSR* 38, 55–59.
- Bowring, J.F., McLean, N.M., Bowring, S.A., 2012. Engineering cyber infrastructure for U-Pb geochronology: Tripoli and U-Pb-Redux. *Geochemistry, Geophys. Geosystems* 12. <https://doi.org/10.1029/2010GC003479>
- 360 Caricchi, L., Simpson, G., Schaltegger, U., 2016. Estimates of volume and magma input in crustal magmatic systems from zircon geochronology: The effect of modeling assumptions and system variables. *Front. Earth Sci.* 4, 48. <https://doi.org/10.3389/FEART.2016.00048/BIBTEX>
- Condon, D.J., Schoene, B., McLean, N.M., Bowring, S.A., Parrish, R.R., 2015. Metrology and traceability of U-Pb isotope dilution geochronology (EARTHTIME Tracer Calibration Part I). *Geochim. Cosmochim. Acta* 164, 464–480. <https://doi.org/10.1016/j.gca.2015.05.026>
- 365 Gerstenberger, H., Haase, G., 1997. A highly effective emitter substance for mass spectrometric Pb isotope ratio determinations. *Chem. Geol.* 136, 309–312. [https://doi.org/10.1016/S0009-2541\(96\)00033-2](https://doi.org/10.1016/S0009-2541(96)00033-2)
- Goldman, D., Sadler, P.M., Leslie, S.A., Agterberg, F.P., Gradstein, F.M., 2020. The Ordovician Period, in: Gradstein, Felix M., Ogg, J.G., Schmitz, M.D., Ogg, G.M. (Eds.), *Geologic Time Scale 2020*. Elsevier, pp. 631–694. <https://doi.org/10.1016/C2020-1-02369-3>
- 370 Huyskens, M.H., Zink, S., Amelin, Y., 2016. Evaluation of temperature-time conditions for the chemical abrasion treatment of single zircons for U-Pb geochronology. *Chem. Geol.* 438, 25–35. <https://doi.org/10.1016/J.CHEMGEO.2016.05.013>
- Keller, B.C., Boehnke, P., Schoene, B., Harrison, T.M., 2019. Stepwise chemical abrasion-isotope dilution-thermal ionization mass spectrometry with trace element analysis of microfractured Hadean zircon. *Geochronology* 1, 85–97. <https://doi.org/10.5194/GCHRON-1-85-2019>
- 375 Keller, C.B., Schoene, B., Samperton, K.M., 2018. A stochastic sampling approach to zircon eruption age interpretation. *Geochemical Perspect. Lett.* 8, 31–35. <https://doi.org/10.7185/GEOCHEMLET.1826>
- Lindskog, A., Costa, M.M., Rasmussen, C.M., Connelly, J.N., Eriksson, M.E., 2017. Refined Ordovician timescale reveals no link between asteroid breakup and biodiversification. *Nat. Commun.* 2017 81 8, 1–8. <https://doi.org/10.1038/ncomms14066>
- 380 Lindskog, A., Eriksson, M.E., 2017. Megascopic processes reflected in the microscopic realm: sedimentary and biotic dynamics of the Middle Ordovician “orthoceratite limestone” at Kinnekulle, Sweden. *GFF* 139, 163–183. <https://doi.org/10.1080/11035897.2017.1291538>
- Lindstrom, M., 1974. Volcanic contribution to Ordovician pelagic sediments. *J. Sediment. Res.* 44, 287–291. <https://doi.org/10.1306/74D72A13-2B21-11D7-8648000102C1865D>
- 385 Mattinson, J.M., 2005. Zircon U-Pb chemical abrasion (“CA-TIMS”) method: Combined annealing and multi-step partial dissolution analysis for improved precision and accuracy of zircon ages. *Chem. Geol.* 220, 47–66. <https://doi.org/10.1016/J.CHEMGEO.2005.03.011>



- McKanna, A.J., Koran, I., Schoene, B., Ketcham, R.A., 2023a. Chemical abrasion: the mechanics of zircon dissolution. *Geochronology* 5, 127–151. <https://doi.org/10.5194/gchron-5-127-2023>
- 390 McKanna, A.J., Schoene, B., Szymanowski, D., 2023b. Geochronological and Geochemical Effects of Zircon Chemical Abrasion: Insights from Single-Crystal Stepwise Dissolution Experiments. *Geochronology*.
- McLaughlin, P.I., Normore, L., Sell, B.K., Ramezani, J., 2023. Ordovician tephra distribution, tephrochronology and geochronology. *Geol. Soc. London, Spec. Publ.* 532, 79–90. <https://doi.org/10.1144/SP532-2022-267>
- McLean, N.M., Bowring, J.F., Bowring, S.A., 2011. An algorithm for U-Pb isotope dilution data reduction and uncertainty propagation. *Geochemistry, Geophys. Geosystems* 12, 0–18. <https://doi.org/10.1029/2010GC003478>
- 395 McLean, N.M., Condon, D.J., Schoene, B., Bowring, S.A., 2015. Evaluating uncertainties in the calibration of isotopic reference materials and multi-element isotopic tracers (EARTHTIME Tracer Calibration Part II) - ScienceDirect. *Geochim. Cosmochim. Acta* 164, 481–501.
- Mezger, K., Krogstad, E.J., 1997. Interpretation of discordant U-Pb zircon ages: An evaluation. *J. Metamorph. Geol.* 15, 127–  
400 140. <https://doi.org/10.1111/J.1525-1314.1997.00008.X>
- Nielsen, A.T., Ove, J., Ebbestad, R., Hammer, Ø., Alexander, D., Harper, T., Lindskog, A., Mac, C., Rasmussen, Ø., Stouge, S., 2023. The Ordovician of Scandinavia: a revised regional stage classification. *Geol. Soc. London, Spec. Publ.* 532, 267–315. <https://doi.org/10.1144/SP532-2022-157>
- Samperton, K.M., Schoene, B., Cottle, J.M., Brenhin Keller, C., Crowley, J.L., Schmitz, M.D., 2015. Magma emplacement, differentiation and cooling in the middle crust: Integrated zircon geochronological–geochemical constraints from the Bergell Intrusion, Central Alps. *Chem. Geol.* 417, 322–340. <https://doi.org/10.1016/J.CHEMGEO.2015.10.024>
- Schaltegger, U., Ovtcharova, M., Gaynor, S.P., Schoene, B., Wotzlaw, J.-F., Davies, J.F.H.L., Farina, F., Greber, N.D., Szymanowski, D., Chelle-Michou, C., 2021. Long-term repeatability and interlaboratory reproducibility of high-precision ID-TIMS U–Pb geochronology. *J. Anal. At. Spectrom.* 36, 1466–1477. <https://doi.org/10.1039/D1JA00116G>
- 410 Schmitz, M.D., Schoene, B., 2007. Derivation of isotope ratios, errors, and error correlations for U-Pb geochronology using 205Pb-235U-(233U)-spiked isotope dilution thermal ionization mass spectrometric data. *Geochemistry, Geophys. Geosystems* 8. <https://doi.org/10.1029/2006GC001492>
- Schoene, B., Crowley, J.L., Condon, D.J., Schmitz, M.D., Bowring, S.A., 2006. Reassessing the uranium decay constants for geochronology using ID-TIMS U-Pb data. *Geochim. Cosmochim. Acta* 70, 426–445.  
415 <https://doi.org/10.1016/j.gca.2005.09.007>
- Servais, T., Harper, D.A.T., 2018. The Great Ordovician Biodiversification Event (GOBE): definition, concept and duration. *Lethaia* 51, 151–164. <https://doi.org/10.1111/LET.12259>
- von Quadt, A., Jörn-Frederik Wotzlaw, Yannick Buret, E. Large, S.J., Irena Peytcheva, Anne Trinquier, 2016. High-precision zircon U/Pb geochronology by ID-TIMS using new 10 13 ohm resistors. *J. Anal. At. Spectrom.* 31, 658–665.  
420 <https://doi.org/10.1039/C5JA00457H>

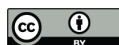

- Watson, E.B., Cherniak, D.J., Hanchar, J.M., Harrison , T.M., Wark, D.A., 1997. The incorporation of Pb into zircon. *Chem. Geol.* 141, 19–31.
- Weber, G., Caricchi, L., Arce, J.L., Schmitt, A.K., 2020. Determining the current size and state of subvolcanic magma reservoirs. *Nat. Commun.* 2020 111 11, 1–14. <https://doi.org/10.1038/s41467-020-19084-2>
- 425 Widmann, P., Davies, J.H.F.L., Schaltegger, U., 2019. Calibrating chemical abrasion: Its effects on zircon crystal structure, chemical composition and UPb age. *Chem. Geol.* 511, 1–10. <https://doi.org/10.1016/J.CHEMGEO.2019.02.026>
